# Supplementary material for: 2D bimetallic Ni/Fe MOF nanosheet composites as a peroxidase-like nanozyme for colorimetric assay of multiple targets
Source: Royal Society of Chemistry journal article supplement (doi:10.1039/d1ay00281c), 2021-01-01
Supplement: d1ay00281c1.pdf [file d1ay00281c1.pdf]

## Electronic Supplementary Information

### Material and reagents

All chemical reagents used in this experiment were analytically pure and were not further purified before use.  $\text{NiCl}_2 \cdot 6\text{H}_2\text{O}$ ,  $\text{FeCl}_3 \cdot 6\text{H}_2\text{O}$ , and *p*-benzoquinone were obtained from Chengdu Kelong Chemical Reagent Factory (Chengdu, China). Terephthalic acid was purchased from Aladdin (Shanghai, China). 3,3',5,5'-tetramethylbenzidine (TMB) was obtained from Sigma-Aldrich (Shanghai, China). Hydrogen peroxide was purchased from Sinopharm Chemical Reagent Co. (Shanghai, China). Ethanol, triethylamine, thiourea (TH), and  $\text{NaN}_3$  were purchased by Chongqing Taixin Chemical Co. Ltd. (Beibei, Chongqing). Ultrapure water was used throughout whole trials.

### Apparatus

The major apparatuses used in this work were UV-2450 UV-visible spectrophotometer (Suzhou, Shimadzu), PHS-3D precision pH meter (Shanghai Precision Scientific Instrument Co., LTD., China), Type SZCL-B constant temperature heating magnetic stirrer (Zhengzhou Great Wall Science and Trade Co., LTD., China), Type KQ-500DE ultrasonic cleaner (Kunshan Ultrasonic Instrument Co., LTD., China), TGL-20M high-speed table refrigerated centrifuge (Xiangyi, China), JEM 2100 transmission electron microscope (JEOL, Japan, operating voltage 200 kV), Type Hitachi SU8010 scanning electron microscopy (Hitachi, Japan), Renishaw Raman microscope (Renishaw in Via Raman microscope, UK), and ASAP 2020 Micromeritics instrument (Mike, USA).

### Steady-state kinetic of the 2D Ni/Fe MOF

The steady state kinetic assays were carried out for the 2D Ni/Fe MOF, where 0.10 mM  $\text{H}_2\text{O}_2$  or 0.10 mM TMB was used alternatively at a fixed concentration of one substrate versus varying concentrations of the other one. The Lineweaver–Burk plots by the double reciprocal of the Michaelis–Menten equation (eq. 1) were thus performed to calculate the Michaelis constants ( $K_m$ ) and the maximal reaction velocity ( $V_{\max}$ ).

$$1/v_0 = K_m/V_{\max} (1/[S] + 1/K_m) \quad (1)$$

**Table S1.** Contents of C, O, Fe, and Ni elements in the 2D Ni/Fe MOF from EDS analysis.

| Element | Atomic (%) |
|---------|------------|
| C       | 64.6       |
| O       | 29.2       |
| Fe      | 2.20       |
| Ni      | 4.00       |

**Table S2.** BET specific surface areas, pore volumes, and average pore diameters of the Ni-MOF, Fe-MOF and 2D Ni/Fe MOF.

| Samples      | Surface area (m <sup>2</sup> /g) | Total pore volume (cm <sup>3</sup> /g) | Average pore diameter (nm) |
|--------------|----------------------------------|----------------------------------------|----------------------------|
| Ni-MOF       | 17.95                            | 0.11                                   | 21.7                       |
| Fe-MOF       | 10.68                            | 0.041                                  | /                          |
| 2D Ni/Fe MOF | 75.31                            | 0.19                                   | 12.9                       |

**Table S3.** Catalytic activity difference among different batches of Ni/Fe MOF prepared with the same method.

| Batch No.              | 1   | 2    | 3    | RSD (%) <sup>a</sup> |
|------------------------|-----|------|------|----------------------|
| Catalytic activity (%) | 100 | 98.0 | 97.6 | 1.3                  |

<sup>a</sup> RSD for three batches of Ni/Fe MOF.

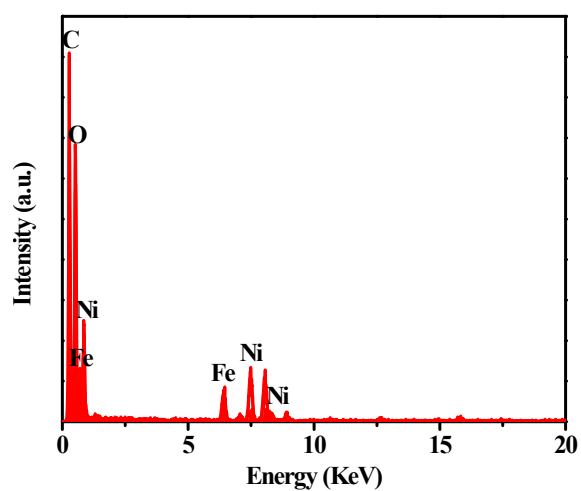

**Figure S1.** EDS spectrum of the 2D Ni/Fe MOF.

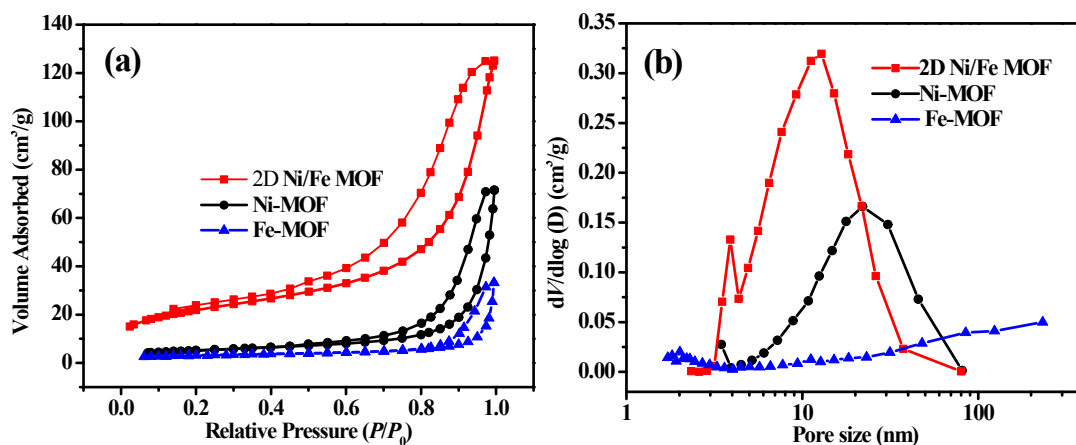

**Figure S2.** (a) Nitrogen adsorption-desorption isothermal curves of the Ni-MOF, Fe-MOF and 2D Ni/Fe MOF; (b) Pore diameter distribution curves of the Ni-MOF, Fe-MOF and 2D Ni/Fe MOF.

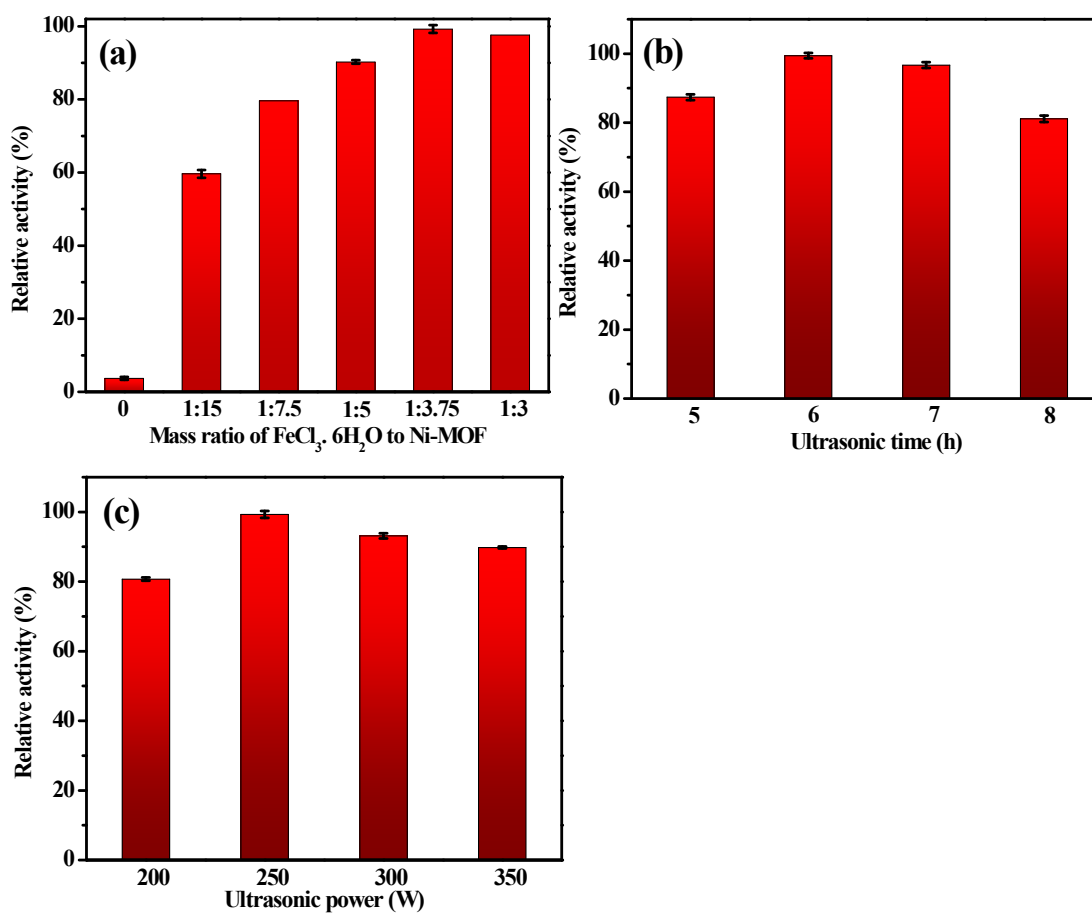

**Figure S3.** Effects of (a) mass ratio of FeCl<sub>3</sub>·6H<sub>2</sub>O to Ni-MOF, (b) ultrasonic time, and (c) ultrasonic power on the peroxidase-like activities of the resultant product; Conditions: 0.1 mM TMB, 0.1 mM H<sub>2</sub>O<sub>2</sub>, 20 mg/L catalyst, 25 °C, 15 min, 0.2 M NaAc-HAc buffer (pH 3.0). Error bar shows the standard deviation of three independent measurements.

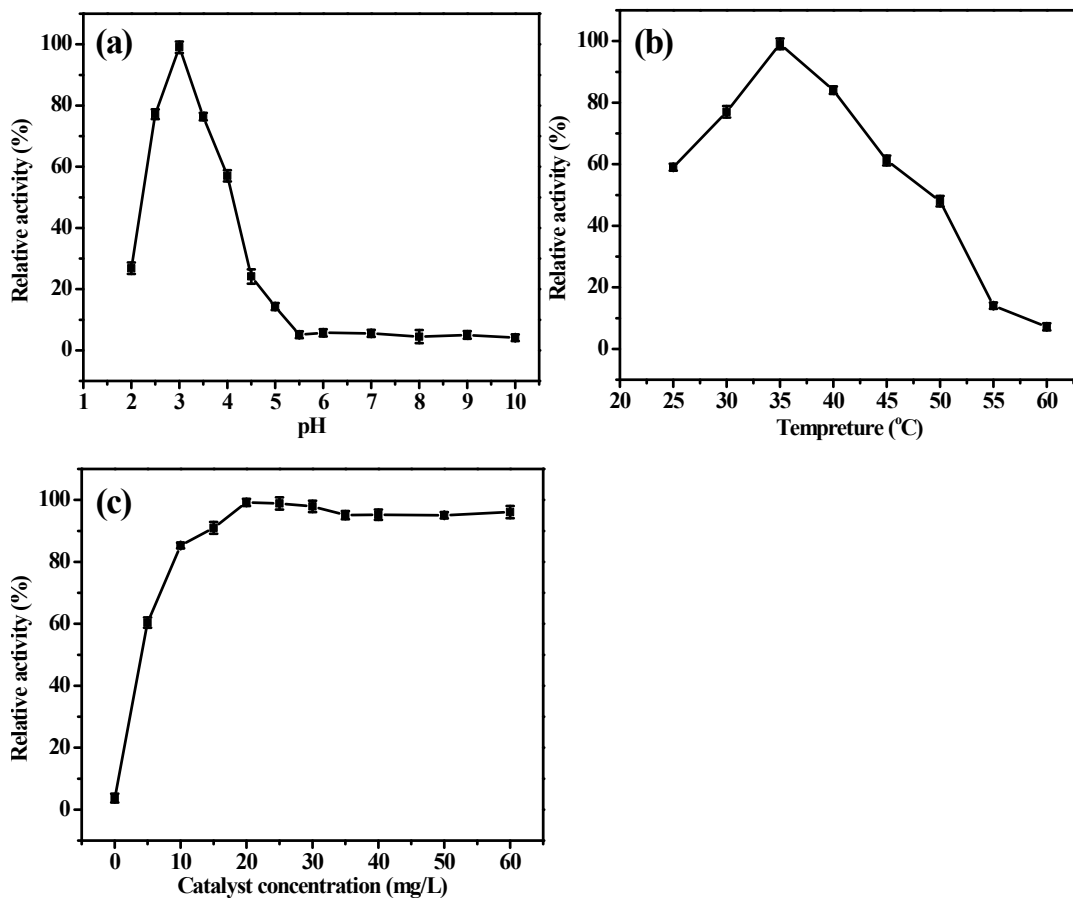

**Figure S4.** (a) Effect of solution pH value on the peroxidase-like activities of the 2D Ni/Fe MOF. Conditions: 0.1 mM TMB, 0.1 mM H<sub>2</sub>O<sub>2</sub>, 20 mg/L catalyst, 35 °C, 15 min. (b) Effect of temperature on the peroxidase-like activities of the 2D Ni/Fe MOF. Conditions: 0.1 mM TMB, 0.1 mM H<sub>2</sub>O<sub>2</sub>, 20 mg/L catalyst, 15 min, 0.2 M NaAc-HAc buffer (pH 3.0). (c) Effect of concentration of 2D Ni/Fe MOF on the peroxidase-like activities of the 2D Ni/Fe MOF. Conditions: 0.1 mM TMB, 0.1 mM H<sub>2</sub>O<sub>2</sub>, 35 °C, 15 min, 0.2 M NaAc-HAc buffer (pH 3.0). Error bar shows the standard deviation of three independent measurements.

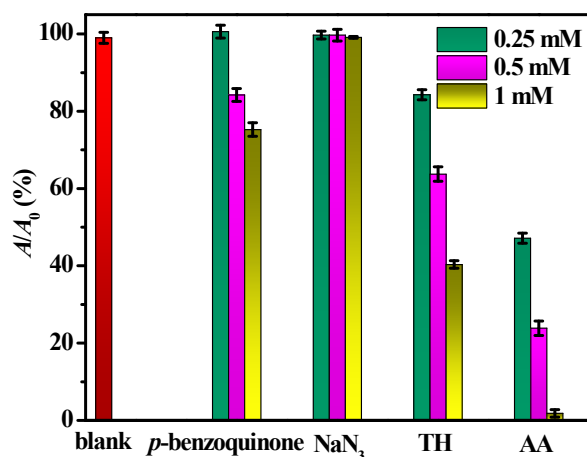

**Figure S5.** The effects of different reactive oxygen species (ROS) scavengers with varied concentrations on the  $A/A_0$  of the 2D Ni/Fe MOF/TMB/  $H_2O_2$  system. The  $A$  and  $A_0$  are the  $A_{652}$  of the 2D Ni/Fe MOF/TMB/ $H_2O_2$  system with and without ROS scavengers, respectively. Reaction conditions: 0.1 mM TMB, 0.1 mM  $H_2O_2$ , 20 mg/L catalyst, pH 3.0 acetate buffer (0.2 M), 15 min reaction at 35 °C. Error bar shows the standard deviation of three independent measurements.

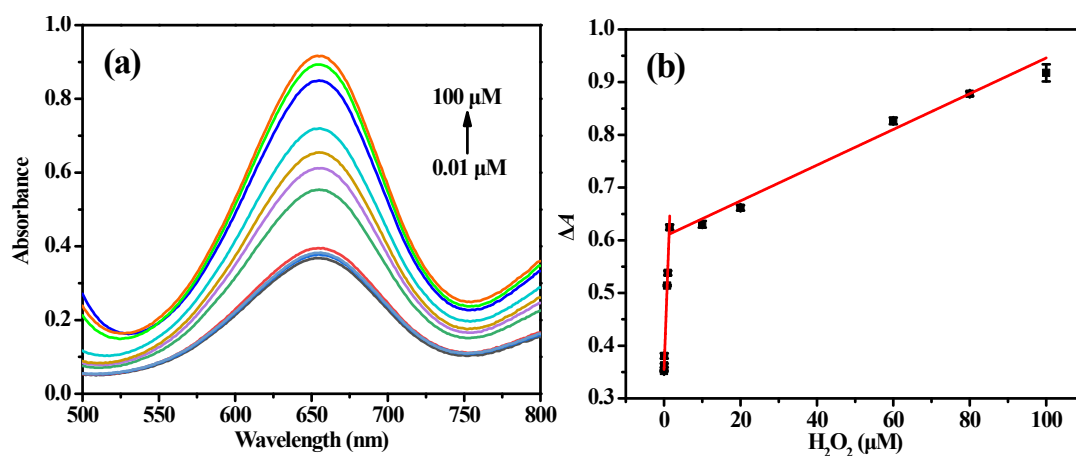

**Figure S6.** (a) UV-vis spectra and (b) corresponding linear-fitted lines of the 2D Ni/Fe MOF catalyzed TMB oxidation with different concentrations of  $H_2O_2$ . Error bar shows the standard deviation of three independent measurements.

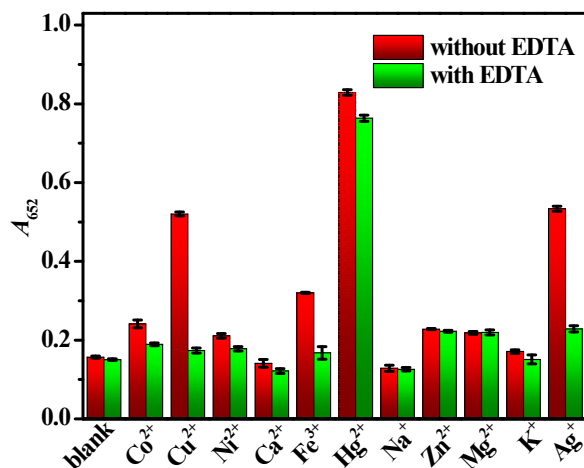

**Figure S7.**  $A_{652}$  of the TMB/H<sub>2</sub>O<sub>2</sub>/2D Ni/Fe MOF/GSH system in the presence of 100  $\mu$ M different metal ions with and without 0.5 mM EDTA. Reaction conditions: 0.1 mM TMB, 0.1 mM H<sub>2</sub>O<sub>2</sub>, 20 mg/L Ni/Fe MOF dispersion, 60  $\mu$ M GSH, pH 3.0 acetate buffer (0.2 M), 35 °C for 15 min reaction. Error bar shows the standard deviation of three independent measurements.

**Table S4.** Comparison of analytical performance of the 2D Ni/Fe MOF nanozyme for sensing H<sub>2</sub>O<sub>2</sub>, GSH, and Hg<sup>2+</sup> with other materials.

| Catalyst                               | targets                       | Measurement method | Linear range ( $\mu$ M) | LOD ( $\mu$ M) | Refs      |
|----------------------------------------|-------------------------------|--------------------|-------------------------|----------------|-----------|
| Cu NPs                                 | H <sub>2</sub> O <sub>2</sub> | Colorimetry        | 0.15 – 12.5             | 0.132          | [1]       |
| NiFe LDH nanosheet                     | H <sub>2</sub> O <sub>2</sub> | Colorimetry        | 10 – 500                | 4.4            | [2]       |
| NiS nanocubes                          | H <sub>2</sub> O <sub>2</sub> | Colorimetry        | 4 – 40                  | 1.72           | [3]       |
| Ru–C <sub>3</sub> N <sub>4</sub>       | H <sub>2</sub> O <sub>2</sub> | Fluorimetry        | 0.2 – 1000              | 0.05           | [4]       |
| 2D Ni/Fe MOF                           | H <sub>2</sub> O <sub>2</sub> | Colorimetry        | 0.01 – 100              | 0.01           | This work |
| MnO <sub>2</sub> -SiO <sub>2</sub> NPs | GSH                           | Fluorimetry        | 0.5 – 100               | 0.2            | [5]       |
| MnO <sub>2</sub> nanosheets            | GSH                           | Colorimetry        | 1 – 25                  | 0.3            | [6]       |
| Fe <sub>3</sub> O <sub>4</sub> NPs     | GSH                           | Colorimetry        | 3 – 30                  | 3              | [7]       |
| Cu <sub>1.8</sub> S NPs                | GSH                           | Colorimetry        | 500 – 10000             | 60             | [8]       |
| 2D Ni/Fe MOF                           | GSH                           | Colorimetry        | 0.02 – 100              | 0.01           | This work |
| DNA/AuNPs                              | Hg <sup>2+</sup>              | Colorimetry        | 0 – 5                   | 0.5            | [9]       |
| Ag@GO hybrid                           | Hg <sup>2+</sup>              | Colorimetry        | 10 – 200                | 0.338          | [10]      |
| TEA-CdSe QDs                           | Hg <sup>2+</sup>              | Fluorimetry        | 0 – 32                  | 0.19           | [11]      |
| 2D Ni/Fe MOF                           | Hg <sup>2+</sup>              | Colorimetry        | 0.1 – 200               | 0.10           | This work |

## References

1. N. Wang, B. Li, F. Qiao, J. Sun, H. Fan, S. Ai, *J. Mater. Chem. B*, 2015, **3**, 7718–7723.
2. T. Zhan, J. Kang, X. Li, L. Pan, G. Li, W. Hou, *Sens. Actuators B*, 2018, **255**, 2635–2642.
3. H. Liu, H. Ma, H. Xu, J. Wen, Z. Huang, Y. Qiu, K. Fan, D. Li, C. Gu, *Anal. Bioanal. Chem.*, 2019, **411**, 129–137.
4. W. Deng, Y. Peng, H. Yang, Y. Tan, M. Ma, Q. Xie, S. Chen, *ACS Appl. Mater. Interfaces*, 2019, **11**, 29072–29077.
5. X. Zhang, R. Kong, Q. Tan, F. Qu, F. Qu, *Talanta*, 2017, **169**, 1–7.
6. J. Liu, L. Meng, Z. Fei, P. J. Dyson, X. Jing, X. Liu, *Biosens. Bioelectron.*, 2017, **90**, 69–74.
7. Y. Ma, Z. Zhang, C. Ren, G. Liu, X. Chen, *Analyst*, 2012, **137**, 485–489.
8. H. Zou, T. Yang, J. Lan, C. Huang, *Anal. Methods*, 2017, **9**, 841–846.
9. X. Xu, J. Wang, K. Jiao, X. Yang, *Biosens. Bioelectron.*, 2009, **24**, 3153–3158.
10. K. Z. Kamali, A. Pandikumar, S. Jayabal, R. Ramaraj, H. N. Lim, B. H. Ong, C. S. D. Bien, Y. Y. Kee, N. M. Huang, *Microchim. Acta*, 2016, **183**, 369–377.
11. Z. B. Shuang, Y. Wang, W. J. Jin, *Talanta*, 2009, **78**, 364–369.
